# Supplementary material for: Novel Nine-Exon AR Transcripts (Exon 1/Exon 1b/Exons 2–8) in Normal and Cancerous Breast and Prostate Cells
Source: MDPI journal article supplement (doi:10.3390/ijms18010040), 2016-12-27
Supplement: s1 [file s1]

# Supplementary Materials: Novel Nine-Exon AR Transcripts (Exon 1/Exon 1b/Exons 2–8) in Normal and Cancerous Breast and Prostate Cells

Dong Gui Hu, Ross A. McKinnon, Julie-Ann Hulin, Peter I. Mackenzie and Robyn Meech

supplemental Figure 1

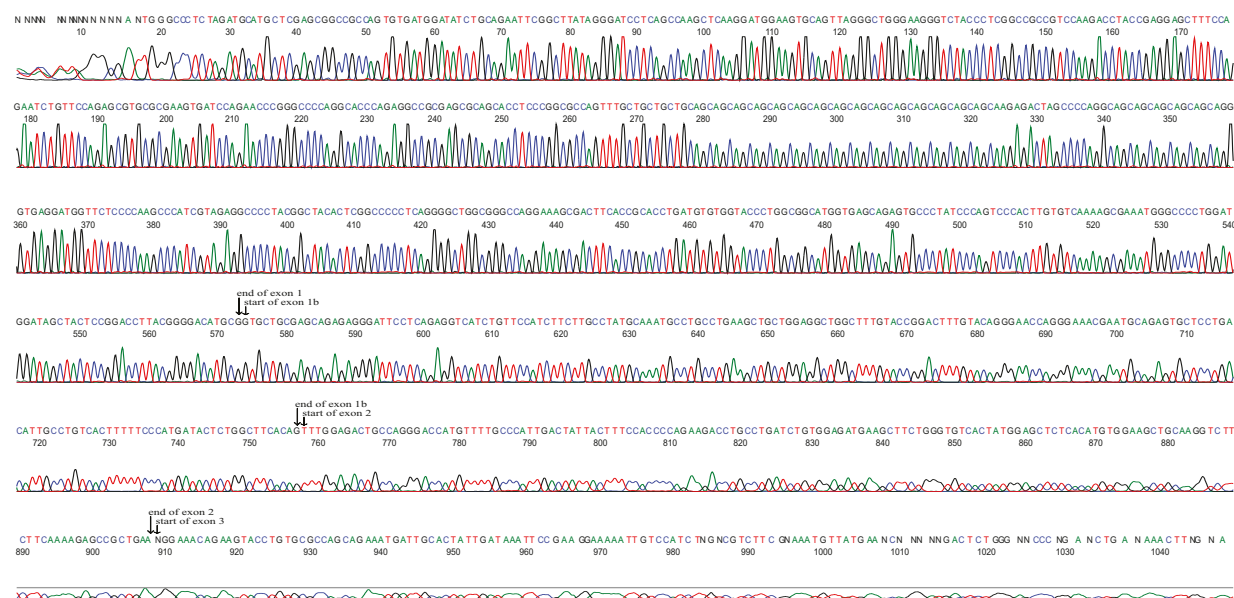

Figure Supplementary 1: Chromatogram of sequencing shows splicing of exon 1b of the AR gene between exon 1 and exon 2 in a clone that was derived from breast cancer MDA-MB-453 cells in RT-PCR designed to amplify the full-length cDNA of the AR gene

**Figure S1.** Chromatogram of sequencing shows splicing of exon 1b of the AR gene between exon 1 and exon 2 in a clone that was derived from breast cancer MDA-MB-453 cells in RT-PCR designed to amplify the full-length cDNA of the AR gene. The nucleotides of A, C, G, T in the chromatogram are in green, blue, black, and red, respectively.

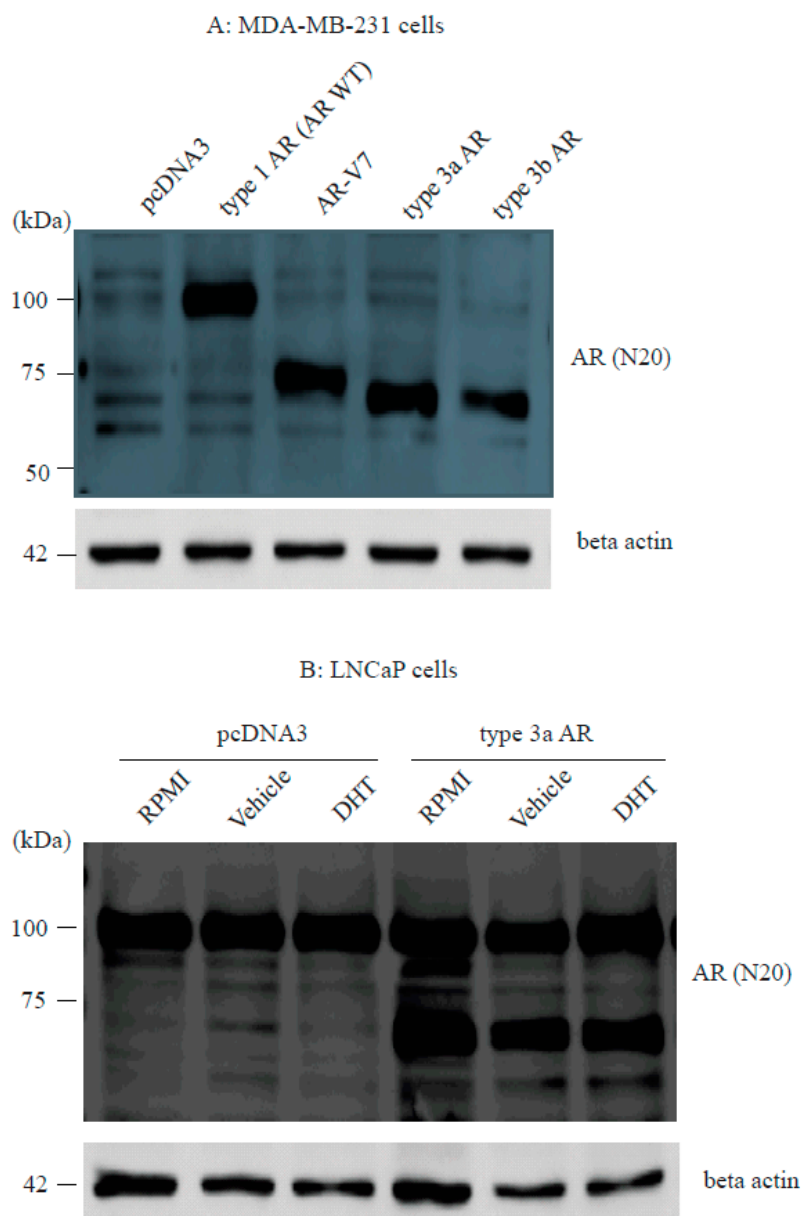

**Figure S2.** The anti-AR antibody (N20) detected low levels of proteins with a molecular weight consistent with type 3 AR proteins in MDA-MB-231 cells (**A**) and LNCaP cells (**B**) in western blotting assays with a 10-minute exposure time. (**A**) MDA-MB-231 cells were transfected with a pcDNA3 vector expressing no ectopic protein (pcDNA3), wild-type AR (AR WT), AR-V7, type 3a AR, or type 3b AR; (**B**) LNCaP cells were transfected with a pcDNA3 vector expressing no ectopic protein (pcDNA3) or type 3a AR. Cell lysates were prepared from transfected cells 48 hours post-transfection and 30 µg of proteins were subjected to Western blotting assays with an antibody recognizing androgen receptor (AR) (N20) or beta actin as described in Methods. Of note, a 10-minute exposure time was applied in order to show low levels of endogenously expressed type 3 AR proteins in MDA-MB-231 (**A**) and LNCaP (**B**) cells.

**Table S1.** Primers used for real-time quantitative PCR.

| Genes          | Forward Primer (5'–3')    | Reverse Primer (5'–3')    | PCR Products Size (bp) |
|----------------|---------------------------|---------------------------|------------------------|
| <i>BCHE</i>    | ACGGTGGGCAAATTTTGCAA      | CATTGTTGAGCACGTAAGTTT     | 149                    |
| <i>COL12A1</i> | CAGAATAACGGTGGACCCTA      | GTTATTGTCACCACATACTC      | 120                    |
| <i>EFNB2</i>   | ACAAATGGAAGAAGTTCGAC      | GAAGATGATGCATCCTGAAG      | 150                    |
| <i>EPHA3</i>   | AGGTGTGCAATGTCATGGAC      | ACCAATGGAATGCTATTGCA      | 130                    |
| <i>GRIN3A</i>  | TGGTGAGCACATAGTATACA      | ACACGTTTGGTCTTGAAATG      | 150                    |
| <i>GSTA1</i>   | ACCTCTATGGGAAAAGACATA     | TGGCATCTTTTCCTCAGGT       | 120                    |
| <i>LRRTM3</i>  | CCCTAAGCCAAAGCAAAAGA      | AGCATTGTCAGTAAGACAGT      | 130                    |
| <i>LRRN1</i>   | TGCCACGGACCTGTGCACAT      | GTCTTGGTTGAGCTGTGTAG      | 130                    |
| <i>PSMD5</i>   | TCACCCTGATGATTCTGTA       | ATAGATTCTCTCCACCAATG      | 140                    |
| <i>PCG-AS</i>  | GCCAATCCGTATATTGTAAA      | TGTAGGCATGATAGATAACA      | 140                    |
| <i>PCG3</i>    | TGGTCTGAAGTTCCAGAAAAG     | GCTTTGGAGGCAGCATTCT       | 140                    |
| <i>PCGEM1</i>  | CCGTAACCTGTGTCTGCAACTTCCT | CATGAAGTGTCAAATGCACCAAGCC | 145                    |
| <i>SLITRK3</i> | CCTGGCGCTCCAGTTTAGGA      | ATCCTAGAGCAATTGTGCTT      | 130                    |
| <i>ST8SIA4</i> | TTCAATCTTCCAGCACAAATG     | AGGCTTAAAACTGCTCTTGA      | 130                    |
| <i>TOX3</i>    | AGACTTCATTACCTGATAAC      | ATTTCGAATTCCTCGTCCCC      | 140                    |
